# Supplementary material for: Beyond RuBisCO: convergent molecular evolution of multiple chloroplast genes in C 4 plants
Source: PeerJ journal article supplement (doi:10.7717/peerj.12791), 2022-01-27

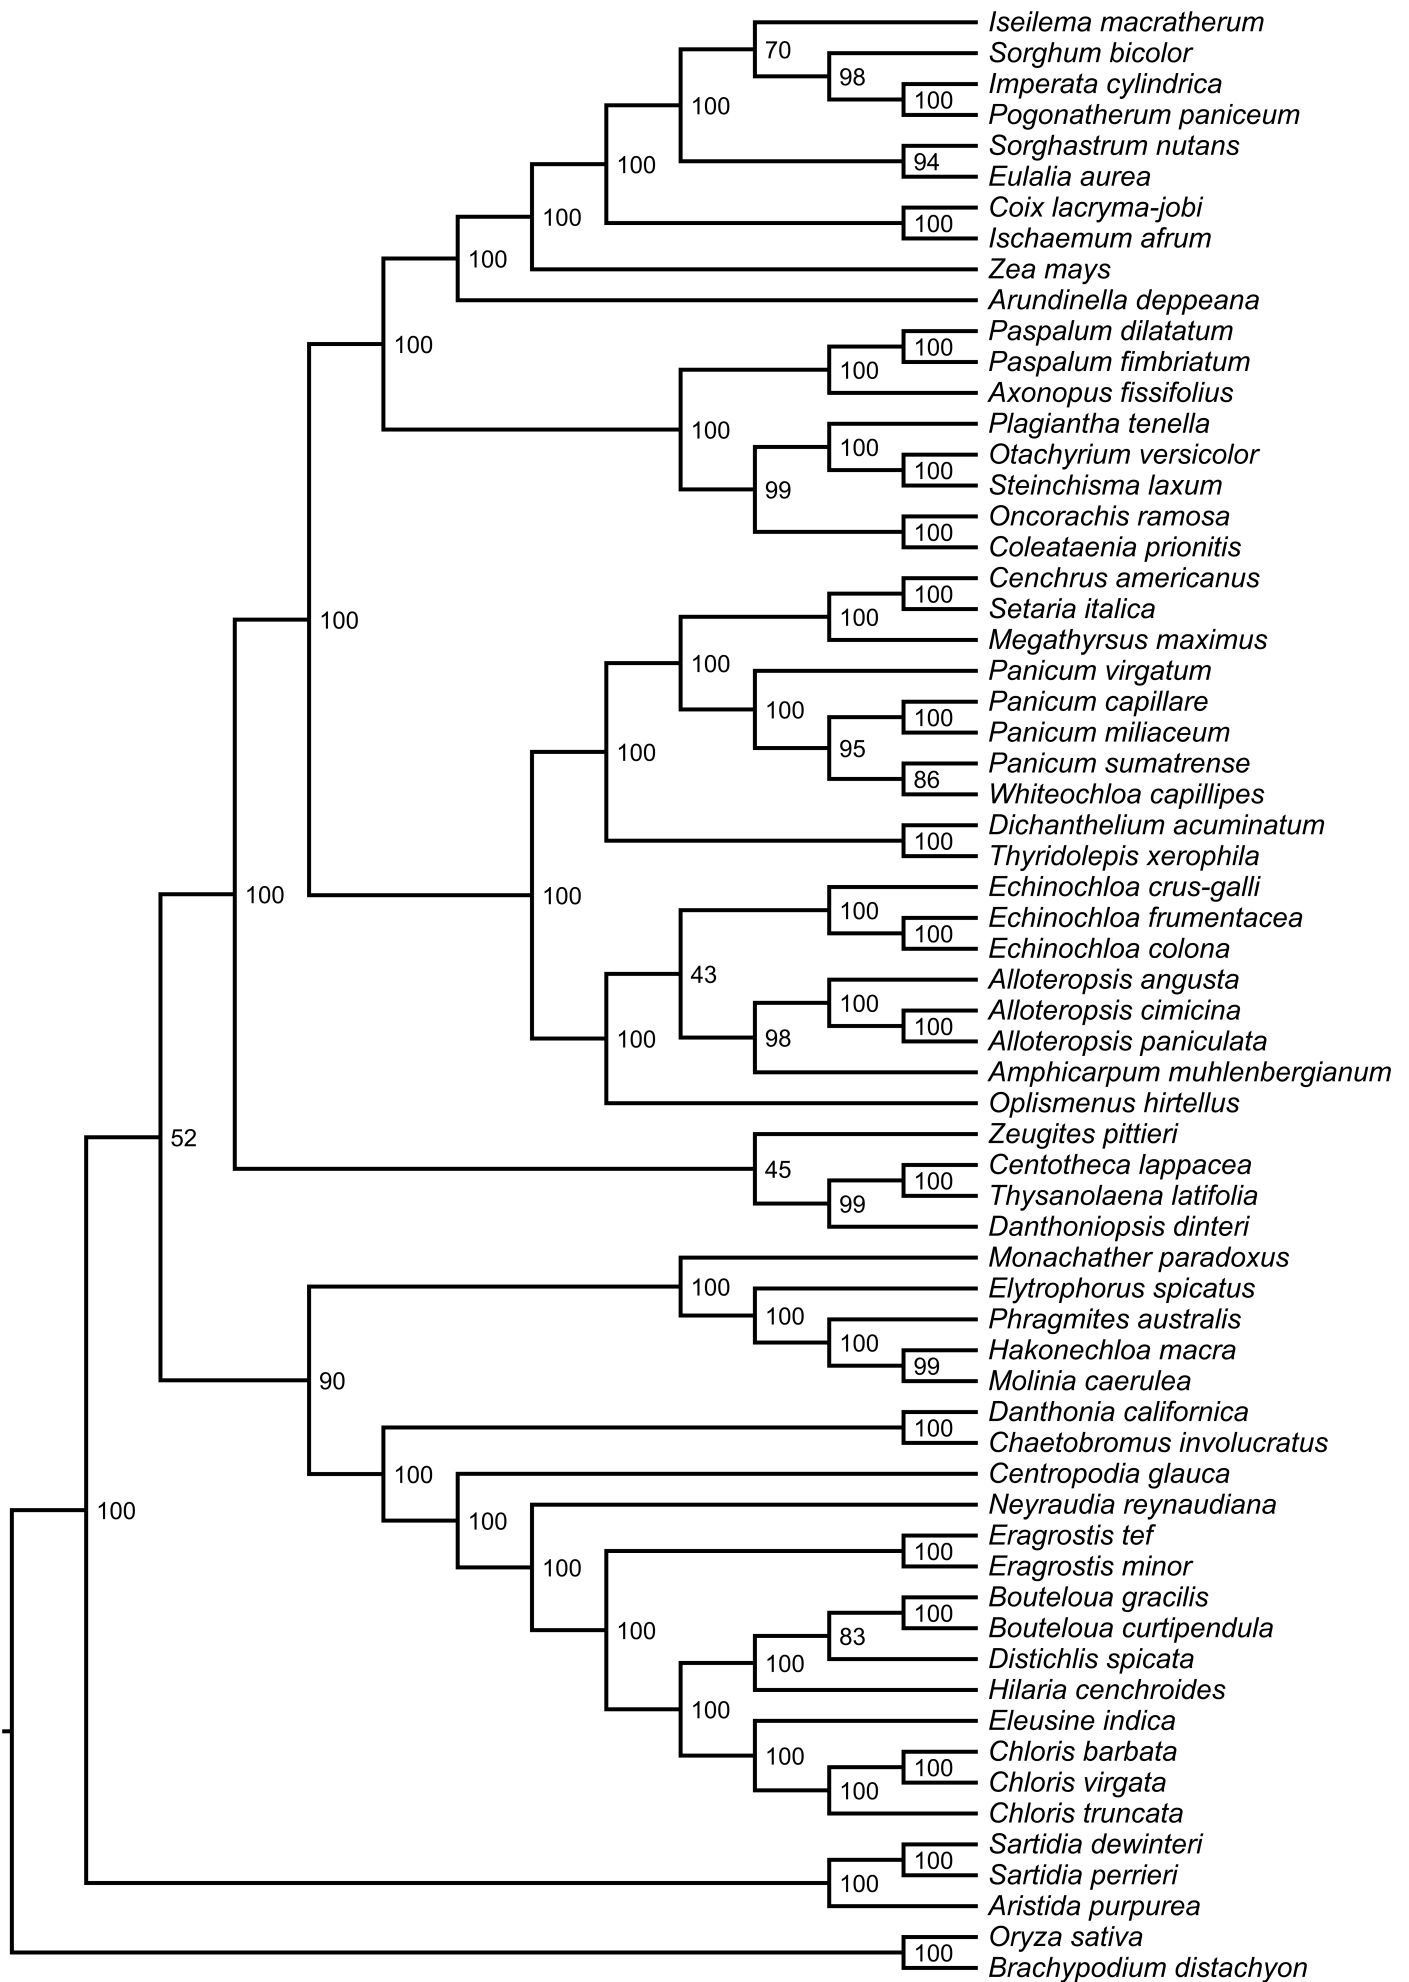

Supplement: Figure_S1.pdf [file Figure_S1.pdf]
