# Supplementary material for: Beyond RuBisCO: convergent molecular evolution of multiple chloroplast genes in C4 plants
Source: PeerJ. 2022 Jan 27;10:e12791. doi: 10.7717/peerj.12791 (PMC8801178; doi:10.7717/peerj.12791)
Supplement: Supplemental Information 1 — List of species, chloroplast genome versions, numbers of coding sequences used for each species, species photosynthesis type, and putative orthologous gene and gene product names (top and bottom header lines, respectively; annotation corresponds to the Zea mays orthologous sequence annotation). Sequences used for analysis are indicated with “X”. [file peerj-10-12791-s001.xlsx]

## Sheet: S1
Species	Genome Version	Number of CDSs	Photosynthesis Type	psbA	matK	rps16	psbK	psbI	psbZ	psbM	petN	rpoB	rpoC1	rpoC2	rps2	atpI	atpH	atpF	atpA	rps14	psaB	psaA	ycf3	rps4	ndhJ	ndhK	ndhC	atpE	atpB	rbcL	psaI	ycf4	cemA	petA	psbJ	psbL	psbF	psbE	petL	petG	psaJ	rpl33	rps18	rpl20	clpP	psbB	psbT	psbN	psbH
				photosystem II protein D1	maturase K	ribosomal protein S16	photosystem II protein K	photosystem II protein I	photosystem II protein Z	photosystem II protein M	cytochrome b6/f complex subunit VIII	RNA polymerase beta subunit	RNA polymerase beta' subunit	RNA polymerase beta'' subunit	ribosomal protein S2	ATP synthase CF0 A subunit	ATP synthase CF0 C subunit	ATP synthase CF0 B subunit	ATP synthase CF1 alpha subunit	ribosomal protein S14	photosystem I P700 chlorophyll a apoprotein A2	photosystem I P700 chlorophyll a apoprotein A1	photosystem I assembly protein Ycf3	ribosomal protein S4	NADH dehydrogenase subunit J	NADH dehydrogenase subunit K	NADH dehydrogenase subunit 3	ATP synthase CF1 epsilon subunit	ATP synthase CF1 beta subunit	ribulose-1,5-bisphosphate carboxylase/oxygenase large subunit	photosystem I subunit VIII	photosystem I assembly protein Ycf4	envelope membrane protein	cytochrome f	photosystem II protein J	photosystem II protein L	photosystem II protein VI	photosystem II protein V	cytochrome b6/f complex subunit VI	cytochrome b6/f complex subunit V	photosystem I subunit IX	ribosomal protein L33	ribosomal protein S18	ribosomal protein L20	ATP-dependent Clp protease proteolytic subunit	photosystem II 47 kDa protein	photosystem II protein T	photosystem II protein N	photosystem II protein H
Zea mays L.	NC_001666.2	67	C4	X	X	X	X	X	X	X	X	X	X	X	X	X	X	X	X	X	X	X	X	X	X	X	X	X	X	X	X	X	X	X	X	X	X	X	X	X	X	X	X	X	X	X	X	X	X
Alloteropsis angusta Stapf	NC_027951.1	66	C4	X	X	X	X	X	X	X	X	X	X	X	X	X	X	X	X	X	X	X	X	X	X	X	X	X	X	X	X	X	X	X	X	X	X	X	X	X	X	X	X	X	X	X	X	X	X
Alloteropsis cimicina (L.) Stapf	NC_027952.1	67	C4	X	X	X	X	X	X	X	X	X	X	X	X	X	X	X	X	X	X	X	X	X	X	X	X	X	X	X	X	X	X	X	X	X	X	X	X	X	X	X	X	X	X	X	X	X	X
Alloteropsis paniculata (Benth.) Stapf	NC_032078.1	67	C4	X	X	X	X	X	X	X	X	X	X	X	X	X	X	X	X	X	X	X	X	X	X	X	X	X	X	X	X	X	X	X	X	X	X	X	X	X	X	X	X	X	X	X	X	X	X
Amphicarpum muhlenbergianum (Schult.) Hitchc.	NC_030619.1	67	C3	X	X	X	X	X	X	X	X	X	X	X	X	X	X	X	X	X	X	X	X	X	X	X	X	X	X	X	X	X	X	X	X	X	X	X	X	X	X	X	X	X	X	X	X	X	X
Aristida purpurea Nutt.	NC_025228.1	67	C4	X	X	X	X	X	X	X	X	X	X	X	X	X	X	X	X	X	X	X	X	X	X	X	X	X	X	X	X	X	X	X	X	X	X	X	X	X	X	X	X	X	X	X	X	X	X
Arundinella deppeana Nees ex Steud.	NC_030620.1	67	C4	X	X	X	X	X	X	X	X	X	X	X	X	X	X	X	X	X	X	X	X	X	X	X	X	X	X	X	X	X	X	X	X	X	X	X	X	X	X	X	X	X	X	X	X	X	X
Axonopus fissifolius (Raddi) Kuhlm.	NC_030501.1	67	C4	X	X	X	X	X	X	X	X	X	X	X	X	X	X	X	X	X	X	X	X	X	X	X	X	X	X	X	X	X	X	X	X	X	X	X	X	X	X	X	X	X	X	X	X	X	X
Bouteloua curtipendula (Michx.) Torr.	NC_029414.1	67	C4	X	X	X	X	X	X	X	X	X	X	X	X	X	X	X	X	X	X	X	X	X	X	X	X	X	X	X	X	X	X	X	X	X	X	X	X	X	X	X	X	X	X	X	X	X	X
Bouteloua gracilis (Kunth) Lag. ex Griffiths	NC_029892.1	66	C4	X	X	X	X	X	X	X	X	X	X	X	X	X	X	X	X	X	X	X	X	X	X	X	X	X	X	X	-	X	X	X	X	X	X	X	X	X	X	X	X	X	X	X	X	X	X
Brachypodium distachyon (L.) P.Beauv.	NC_011032.1	63	C3	X	X	X	-	X	X	X	X	X	X	-	X	X	X	X	X	X	X	X	X	X	X	X	X	X	X	X	X	X	X	X	X	X	X	X	X	X	-	-	X	X	X	X	X	X	X
Cenchrus americanus (L.) Morrone	KX756179.1	67	C4	X	X	X	X	X	X	X	X	X	X	X	X	X	X	X	X	X	X	X	X	X	X	X	X	X	X	X	X	X	X	X	X	X	X	X	X	X	X	X	X	X	X	X	X	X	X
Centotheca lappacea (L.) Desv.	NC_025229.1	67	C3	X	X	X	X	X	X	X	X	X	X	X	X	X	X	X	X	X	X	X	X	X	X	X	X	X	X	X	X	X	X	X	X	X	X	X	X	X	X	X	X	X	X	X	X	X	X
Centropodia glauca (Nees) Cope	NC_029411.1	67	C4	X	X	X	X	X	X	X	X	X	X	X	X	X	X	X	X	X	X	X	X	X	X	X	X	X	X	X	X	X	X	X	X	X	X	X	X	X	X	X	X	X	X	X	X	X	X
Chaetobromus involucratus subsp. dregeanus (Nees) Verboom	KJ920226.1	65	C3	X	X	X	X	X	X	X	X	X	X	X	X	X	X	X	X	X	X	X	X	X	X	X	X	X	X	X	X	X	X	X	X	X	X	X	-	X	X	X	X	X	X	X	X	X	X
Chloris barbata Sw.	NC_029893.1	67	C4	X	X	X	X	X	X	X	X	X	X	X	X	X	X	X	X	X	X	X	X	X	X	X	X	X	X	X	X	X	X	X	X	X	X	X	X	X	X	X	X	X	X	X	X	X	X
Chloris truncata R.Br.	NC_032033.1	67	C4	X	X	X	X	X	X	X	X	X	X	X	X	X	X	X	X	X	X	X	X	X	X	X	X	X	X	X	X	X	X	X	X	X	X	X	X	X	X	X	X	X	X	X	X	X	X
Chloris virgata Sw.	NC_032034.1	67	C4	X	X	X	X	X	X	X	X	X	X	X	X	X	X	X	X	X	X	X	X	X	X	X	X	X	X	X	X	X	X	X	X	X	X	X	X	X	X	X	X	X	X	X	X	X	X
Coix lacryma-jobi L.	NC_013273.1	66	C4	X	X	X	X	X	X	X	X	X	X	X	X	X	X	X	X	X	X	X	X	X	X	-	X	X	X	X	X	X	X	X	X	X	X	X	X	X	X	X	X	X	X	X	X	X	X
Coleataenia prionitis (Nees) Soreng	NC_025231.1	67	C4	X	X	X	X	X	X	X	X	X	X	X	X	X	X	X	X	X	X	X	X	X	X	X	X	X	X	X	X	X	X	X	X	X	X	X	X	X	X	X	X	X	X	X	X	X	X
Danthonia californica Bol.	NC_025232.1	67	C3	X	X	X	X	X	X	X	X	X	X	X	X	X	X	X	X	X	X	X	X	X	X	X	X	X	X	X	X	X	X	X	X	X	X	X	X	X	X	X	X	X	X	X	X	X	X
Danthoniopsis dinteri (Pilg.) C.E.Hubb.	NC_030502.1	67	C4	X	X	X	X	X	X	X	X	X	X	X	X	X	X	X	X	X	X	X	X	X	X	X	X	X	X	X	X	X	X	X	X	X	X	X	X	X	X	X	X	X	X	X	X	X	X
Dichanthelium acuminatum (Sw.) Gould & C. A. Clark	NC_030623.1	67	C3	X	X	X	X	X	X	X	X	X	X	X	X	X	X	X	X	X	X	X	X	X	X	X	X	X	X	X	X	X	X	X	X	X	X	X	X	X	X	X	X	X	X	X	X	X	X
Distichlis spicata (L.) Greene	NC_029895.1	65	C4	X	X	X	X	X	X	X	X	X	X	X	X	X	X	X	X	X	X	X	X	X	X	X	X	X	X	X	X	X	X	X	X	X	X	X	X	X	X	X	X	X	-	X	X	X	X
Echinochloa colona (L.) Link	NC_032383.1	65	C4	X	X	-	X	X	X	X	X	X	X	X	X	X	X	X	X	X	X	X	X	X	X	X	X	X	X	X	X	X	X	X	X	X	X	X	X	X	X	X	X	X	X	X	X	X	X
Echinochloa crus-galli (L.) P.Beauv.	NC_028719.1	67	C4	X	X	X	X	X	X	X	X	X	X	X	X	X	X	X	X	X	X	X	X	X	X	X	X	X	X	X	X	X	X	X	X	X	X	X	X	X	X	X	X	X	X	X	X	X	X
Echinochloa frumentacea Link	NC_029827.1	65	C4	X	X	-	X	X	X	X	X	X	X	X	X	X	X	X	X	X	X	X	X	X	X	X	X	X	X	X	X	X	X	X	X	X	X	X	X	X	X	X	X	X	X	X	X	X	X
Eleusine indica (L.) Gaertn.	NC_030486.1	67	C4	X	X	X	X	X	X	X	X	X	X	X	X	X	X	X	X	X	X	X	X	X	X	X	X	X	X	X	X	X	X	X	X	X	X	X	X	X	X	X	X	X	X	X	X	X	X
Elytrophorus spicatus (Willd.) A.Camus	NC_025233.1	67	C3	X	X	X	X	X	X	X	X	X	X	X	X	X	X	X	X	X	X	X	X	X	X	X	X	X	X	X	X	X	X	X	X	X	X	X	X	X	X	X	X	X	X	X	X	X	X
Eragrostis minor Host	NC_029412.1	67	C4	X	X	X	X	X	X	X	X	X	X	X	X	X	X	X	X	X	X	X	X	X	X	X	X	X	X	X	X	X	X	X	X	X	X	X	X	X	X	X	X	X	X	X	X	X	X
Eragrostis tef (Zuccagni) Trotter	NC_029413.1	66	C4	X	X	X	X	X	X	X	X	-	X	X	X	X	X	X	X	X	X	X	X	X	X	X	X	X	X	X	X	X	X	X	X	X	X	X	X	X	X	X	X	X	X	X	X	X	X
Eulalia aurea (Bory) Kunth	NC_030503.1	67	C4	X	X	X	X	X	X	X	X	X	X	X	X	X	X	X	X	X	X	X	X	X	X	X	X	X	X	X	X	X	X	X	X	X	X	X	X	X	X	X	X	X	X	X	X	X	X
Hakonechloa macra (Munro) Makino	NC_025235.1	65	C3	X	X	X	X	X	X	X	X	X	X	X	X	X	X	X	X	X	X	X	X	X	X	X	X	X	X	X	X	X	X	X	X	X	X	X	X	X	X	X	X	X	X	X	X	X	X
Hilaria cenchroides Kunth	NC_029415.1	67	C4	X	X	X	X	X	X	X	X	X	X	X	X	X	X	X	X	X	X	X	X	X	X	X	X	X	X	X	X	X	X	X	X	X	X	X	X	X	X	X	X	X	X	X	X	X	X
Imperata cylindrica (L.) P.Beauv.	NC_030487.1	67	C4	X	X	X	X	X	X	X	X	X	X	X	X	X	X	X	X	X	X	X	X	X	X	X	X	X	X	X	X	X	X	X	X	X	X	X	X	X	X	X	X	X	X	X	X	X	X
Ischaemum afrum (J.F.Gmel.) Dandy	NC_030488.1	67	C4	X	X	X	X	X	X	X	X	X	X	X	X	X	X	X	X	X	X	X	X	X	X	X	X	X	X	X	X	X	X	X	X	X	X	X	X	X	X	X	X	X	X	X	X	X	X
Iseilema macratherum Domin	NC_030611.1	67	C4	X	X	X	X	X	X	X	X	X	X	X	X	X	X	X	X	X	X	X	X	X	X	X	X	X	X	X	X	X	X	X	X	X	X	X	X	X	X	X	X	X	X	X	X	X	X
Megathyrsus maximus (Jacq.) B.K.Simon & S.W.L.Jacobs	NC_030489.1	67	C4	X	X	X	X	X	X	X	X	X	X	X	X	X	X	X	X	X	X	X	X	X	X	X	X	X	X	X	X	X	X	X	X	X	X	X	X	X	X	X	X	X	X	X	X	X	X
Molinia caerulea (L.) Moench	NC_033980.1	65	C3	X	X	X	X	X	X	X	X	X	X	X	X	X	X	X	X	X	X	X	X	X	X	X	X	X	X	X	X	X	X	X	X	X	X	X	X	X	X	X	X	X	X	X	X	X	X
Monachather paradoxus Steud.	NC_025237.1	67	C3	X	X	X	X	X	X	X	X	X	X	X	X	X	X	X	X	X	X	X	X	X	X	X	X	X	X	X	X	X	X	X	X	X	X	X	X	X	X	X	X	X	X	X	X	X	X
Neyraudia reynaudiana (Kunth) Keng ex Hitchc.	NC_024262.1	67	C4	X	X	X	X	X	X	X	X	X	X	X	X	X	X	X	X	X	X	X	X	X	X	X	X	X	X	X	X	X	X	X	X	X	X	X	X	X	X	X	X	X	X	X	X	X	X
Oncorachis ramosa (Zuloaga & Soderstr.) Morrone & Zuloaga	NC_030490.1	67	C4	X	X	X	X	X	X	X	X	X	X	X	X	X	X	X	X	X	X	X	X	X	X	X	X	X	X	X	X	X	X	X	X	X	X	X	X	X	X	X	X	X	X	X	X	X	X
Oplismenus hirtellus (L.) P.Beauv.	NC_030491.1	67	C3	X	X	X	X	X	X	X	X	X	X	X	X	X	X	X	X	X	X	X	X	X	X	X	X	X	X	X	X	X	X	X	X	X	X	X	X	X	X	X	X	X	X	X	X	X	X
Oryza sativa subsp. indica Kato	NC_027678.1	64	C3	X	X	X	X	X	X	X	X	X	X	X	X	X	X	X	X	X	X	X	X	X	X	-	-	X	X	X	X	X	X	X	X	X	X	X	X	X	X	X	X	X	X	X	X	X	X
Otachyrium versicolor (Doell) Henrard	NC_030492.1	67	C3	X	X	X	X	X	X	X	X	X	X	X	X	X	X	X	X	X	X	X	X	X	X	X	X	X	X	X	X	X	X	X	X	X	X	X	X	X	X	X	X	X	X	X	X	X	X
Panicum capillare L.	NC_030493.1	67	C4	X	X	X	X	X	X	X	X	X	X	X	X	X	X	X	X	X	X	X	X	X	X	X	X	X	X	X	X	X	X	X	X	X	X	X	X	X	X	X	X	X	X	X	X	X	X
Panicum miliaceum L.	NC_029732.1	67	C4	X	X	X	X	X	X	X	X	X	X	X	X	X	X	X	X	X	X	X	X	X	X	X	X	X	X	X	X	X	X	X	X	X	X	X	X	X	X	X	X	X	X	X	X	X	X
Panicum sumatrense Roth ex Roem. & Schult.	NC_032378.1	67	C4	X	X	X	X	X	X	X	X	X	X	X	X	X	X	X	X	X	X	X	X	X	X	X	X	X	X	X	X	X	X	X	X	X	X	X	X	X	X	X	X	X	X	X	X	X	X
Panicum virgatum L.	NC_015990.1	67	C4	X	X	X	X	X	X	X	X	X	X	X	X	X	X	X	X	X	X	X	X	X	X	X	X	X	X	X	X	X	X	X	X	X	X	X	X	X	X	X	X	X	X	X	X	X	X
Paspalum dilatatum Poir.	NC_030614.1	67	C4	X	X	X	X	X	X	X	X	X	X	X	X	X	X	X	X	X	X	X	X	X	X	X	X	X	X	X	X	X	X	X	X	X	X	X	X	X	X	X	X	X	X	X	X	X	X
Paspalum fimbriatum Kunth	NC_030495.1	67	C4	X	X	X	X	X	X	X	X	X	X	X	X	X	X	X	X	X	X	X	X	X	X	X	X	X	X	X	X	X	X	X	X	X	X	X	X	X	X	X	X	X	X	X	X	X	X
Phragmites australis (Cav.) Trin. ex Steud.	NC_022958.1	67	C3	X	X	X	X	X	X	X	X	X	X	X	X	X	X	X	X	X	X	X	X	X	X	X	X	X	X	X	X	X	X	X	X	X	X	X	X	X	X	X	X	X	X	X	X	X	X
Plagiantha tenella Renvoize	NC_030497.1	67	C3	X	X	X	X	X	X	X	X	X	X	X	X	X	X	X	X	X	X	X	X	X	X	X	X	X	X	X	X	X	X	X	X	X	X	X	X	X	X	X	X	X	X	X	X	X	X
Pogonatherum paniceum (Lam.) Hack.	NC_029881.1	67	C4	X	X	X	X	X	X	X	X	X	X	X	X	X	X	X	X	X	X	X	X	X	X	X	X	X	X	X	X	X	X	X	X	X	X	X	X	X	X	X	X	X	X	X	X	X	X
Sartidia dewinteri Munday & Fish	NC_027147.1	67	C3	X	X	X	X	X	X	X	X	X	X	X	X	X	X	X	X	X	X	X	X	X	X	X	X	X	X	X	X	X	X	X	X	X	X	X	X	X	X	X	X	X	X	X	X	X	X
Sartidia perrieri (A.Camus) Bourreil	NC_027146.1	67	C3	X	X	X	X	X	X	X	X	X	X	X	X	X	X	X	X	X	X	X	X	X	X	X	X	X	X	X	X	X	X	X	X	X	X	X	X	X	X	X	X	X	X	X	X	X	X
Setaria italica (L.) P.Beauv.	KJ001642.1	64	C4	X	X	-	X	X	-	X	X	X	X	X	X	X	X	X	X	X	X	X	-	X	X	X	X	X	X	X	X	X	X	X	X	X	X	X	X	X	X	X	X	X	X	X	X	X	X
Sorghastrum nutans (L.) Nash	NC_030498.1	67	C4	X	X	X	X	X	X	X	X	X	X	X	X	X	X	X	X	X	X	X	X	X	X	X	X	X	X	X	X	X	X	X	X	X	X	X	X	X	X	X	X	X	X	X	X	X	X
Sorghum bicolor (L.) Moench	NC_008602.1	67	C4	X	X	X	X	X	X	X	X	X	X	X	X	X	X	X	X	X	X	X	X	X	X	X	X	X	X	X	X	X	X	X	X	X	X	X	X	X	X	X	X	X	X	X	X	X	X
Steinchisma laxum (Sw.) Zuloaga	NC_030499.1	67	C3	X	X	X	X	X	X	X	X	X	X	X	X	X	X	X	X	X	X	X	X	X	X	X	X	X	X	X	X	X	X	X	X	X	X	X	X	X	X	X	X	X	X	X	X	X	X
Thyridolepis xerophila (Domin) S.T.Blake	NC_030616.1	67	C3	X	X	X	X	X	X	X	X	X	X	X	X	X	X	X	X	X	X	X	X	X	X	X	X	X	X	X	X	X	X	X	X	X	X	X	X	X	X	X	X	X	X	X	X	X	X
Thysanolaena latifolia (Roxb. ex Hornem.) Honda	NC_025238.1	67	C3	X	X	X	X	X	X	X	X	X	X	X	X	X	X	X	X	X	X	X	X	X	X	X	X	X	X	X	X	X	X	X	X	X	X	X	X	X	X	X	X	X	X	X	X	X	X
Whiteochloa capillipes (Benth.) Lazarides	NC_030618.1	67	C4	X	X	X	X	X	X	X	X	X	X	X	X	X	X	X	X	X	X	X	X	X	X	X	X	X	X	X	X	X	X	X	X	X	X	X	X	X	X	X	X	X	X	X	X	X	X
Zeugites pittieri Hack.	NC_030500.1	67	C3	X	X	X	X	X	X	X	X	X	X	X	X	X	X	X	X	X	X	X	X	X	X	X	X	X	X	X	X	X	X	X	X	X	X	X	X	X	X	X	X	X	X	X	X	X	X
[truncated: 21 more columns]
