# Supplementary material for: Beyond RuBisCO: convergent molecular evolution of multiple chloroplast genes in C4 plants
Source: PeerJ. 2022 Jan 27;10:e12791. doi: 10.7717/peerj.12791 (PMC8801178; doi:10.7717/peerj.12791)
Supplement: Supplemental Information 2 — C4 and C3 reference branches are shown in red and black, respectively. Branch lengths were obtained from the RAxML phylogeny based on the AIC partitioning schemes (Fig. S2). [file peerj-10-12791-s002.xlsx]

## Sheet: Sheet1
Reference Branches	A	B	C	E	F	G	I	J	K	P	S	T	V	D	H	L	M	N	O	Q	R	U	Reference Branches
A	-	0.00980955	0.0118246	0.0124618	0.00853701	0.00504399	0.0115222	0.0127588	0.00755909	0.0195115	0.0223721	0.00832746	0.0157116	0.00804627	0.00422272	0.00760251	0.0102834	0.0162764	0.00728985	0.00464825	0.0224011	0.0183231	A
B		-	0.0139715	0.0146087	0.0106838	0.00719082	0.0136691	0.0149057	0.00970592	0.0216583	0.024519	0.0104743	0.0178584	0.0101931	0.00636955	0.00974934	0.0124302	0.0184232	0.00943668	0.00679508	0.0245479	0.0204699	B
C			-	0.0166237	0.0126989	0.00920589	0.0156841	0.0169207	0.011721	0.0236734	0.026534	0.0124894	0.0198735	0.0122082	0.00838463	0.0117644	0.0144453	0.0204383	0.0114518	0.00881015	0.026563	0.022485	C
E				-	0.0133361	0.0098431	0.0163214	0.0175579	0.0123582	0.0243106	0.0271712	0.0131266	0.0205107	0.0128454	0.00902183	0.0124016	0.0150825	0.0210755	0.012089	0.00944736	0.0272002	0.0231222	E
F					-	0.00591828	0.0123965	0.0136331	0.00843339	0.0203858	0.0232464	0.00920175	0.0165859	0.00892057	0.00509702	0.00847681	0.0111577	0.0171507	0.00816414	0.00552255	0.0232754	0.0191974	F
G						-	0.00890351	0.0101401	0.00494036	0.0168927	0.0197534	0.00570873	0.0130928	0.00542754	0.00160399	0.00498378	0.00766466	0.0136576	0.00467112	0.00202952	0.0197823	0.0157044	G
I							-	0.0166184	0.0114186	0.023371	0.0262316	0.012187	0.0195711	0.0119058	0.00808225	0.011462	0.0141429	0.0201359	0.0111494	0.00850778	0.0262606	0.0221826	I
J								-	0.0126552	0.0246076	0.0274682	0.0134236	0.0208077	0.0131424	0.00931884	0.0126986	0.0153795	0.0213725	0.012386	0.00974437	0.0274972	0.0234192	J
K									-	0.0194079	0.0222685	0.00822383	0.0156079	0.00794264	0.0041191	0.00749888	0.0101798	0.0161727	0.00718622	0.00454462	0.0222975	0.0182195	K
P										-	0.0342209	0.0201762	0.0275603	0.019895	0.0160715	0.0194513	0.0221321	0.0281251	0.0191386	0.016497	0.0342498	0.0301718	P
S											-	0.0230369	0.030421	0.0227557	0.0189321	0.0223119	0.0249928	0.0309858	0.0219993	0.0193577	0.0371105	0.0330325	S
T												-	0.0163763	0.00871101	0.00488746	0.00826725	0.0109481	0.0169411	0.00795459	0.00531299	0.0230658	0.0189878	T
V													-	0.0160951	0.0122716	0.0156514	0.0183322	0.0243252	0.0153387	0.0126971	0.0304499	0.0263719	V
D														-	0.00460628	0.00798606	0.0106669	0.0166599	0.0076734	0.0050318	0.0227846	0.0187066	D
H															-	0.00416252	0.00684339	0.0128364	0.00384985	0.00120826	0.0189611	0.0148831	H
L																-	0.0102232	0.0162162	0.00722964	0.00458804	0.0223409	0.0182629	L
M																	-	0.018897	0.00991052	0.00726892	0.0250218	0.0209438	M
N																		-	0.0159035	0.0132619	0.0310147	0.0269367	N
O																			-	0.00427538	0.0220282	0.0179502	O
Q																				-	0.0193866	0.0153086	Q
R																					-	0.0330614	R
U																						-	U
