# Supplementary material for: Beyond RuBisCO: convergent molecular evolution of multiple chloroplast genes in C4 plants
Source: PeerJ. 2022 Jan 27;10:e12791. doi: 10.7717/peerj.12791 (PMC8801178; doi:10.7717/peerj.12791)
Supplement: Supplemental Information 3 — Amino acid replacements are highlighted: light gray –ancestral node (A), dark gray –descendant node (D). Site numbers correspond to the Zea mays orthologous sequence annotation. Chloroplast genes with convergent and/or non-convergentreplacements are shown. Reference branch positions within the phylogeny are shown in Fig. 1. An asterisk is shown next to RbcL protein sites that were previously reported to evolve under positive selection. [file peerj-10-12791-s003.xlsx]

## Sheet: S5
Reference Branch	Node	matK
		11	14	36	39	40	41	46	64	71	77	86	89	93	115	118	119	136	143	150	167	185	196	204	205	231	240	250	259	272	277	278	288	289	295	326	328	340	345	346	361	369	372	376	382	396	427	432	480
A	A	Q	R	G	G	S	E	F	R	W	H	H	Y	E	Q	C	P	I	K	L	L	L	T	L	K	R	T	H	G	F	L	M	I	L	L	Q	T	S	T	L	T	T	A	V	A	V	Q	L	T
	D	Q	R	G	G	S	E	F	R	L	H	H	Y	E	Q	C	P	I	K	L	L	L	T	L	K	R	T	I	G	F	L	M	I	L	L	Q	T	S	T	L	T	T	A	V	A	V	Q	L	T
B	A	Q	R	G	G	S	E	F	R	W	H	H	Y	E	Q	C	P	I	K	L	L	L	T	L	K	R	T	H	G	F	L	M	I	L	P	Q	T	S	T	L	T	T	A	I	A	V	Q	L	T
	D	Q	R	G	G	S	E	F	R	W	H	H	Y	K	Q	C	P	I	K	L	L	L	T	F	S	R	T	H	G	F	L	M	I	L	P	Q	T	S	T	L	T	I	A	I	A	V	Q	L	T
C	A	Q	R	G	G	S	E	F	R	W	H	H	Y	E	Q	C	P	I	K	L	L	L	T	L	K	R	T	H	G	F	L	M	I	L	P	Q	T	S	T	L	T	T	A	I	A	V	Q	L	T
	D	Q	R	R	D	S	E	F	R	W	H	H	S	E	R	C	P	I	K	L	L	L	T	L	K	R	T	Q	G	F	L	M	I	L	S	L	T	S	T	L	T	T	A	I	A	V	Q	L	T
D	A	Q	R	G	G	S	E	F	R	W	H	H	Y	E	Q	C	P	I	K	L	L	L	T	L	K	R	T	H	G	F	L	M	I	L	P	Q	T	S	T	L	T	T	A	V	A	V	Q	L	T
	D	R	R	G	G	S	E	F	R	W	H	H	Y	E	Q	C	S	I	K	R	L	L	T	L	K	R	T	Q	G	F	L	M	I	L	P	Q	T	S	T	L	T	T	V	V	V	V	Q	L	T
E	A	Q	R	G	G	S	E	F	R	W	H	H	Y	E	Q	C	P	I	K	L	L	L	T	L	K	R	T	H	G	F	L	M	I	L	P	Q	T	S	T	L	T	R	A	V	A	V	Q	L	T
	D	Q	R	G	G	S	E	F	Q	W	Q	H	Y	Q	Q	Y	P	I	K	L	L	L	T	L	K	R	T	Q	G	F	F	M	I	F	P	Q	T	S	T	L	T	R	A	V	T	V	Q	L	T
F	A	Q	R	G	G	S	E	F	R	W	H	H	Y	E	Q	C	P	I	K	L	L	L	T	L	K	R	T	H	G	F	L	M	I	L	P	Q	T	S	T	L	T	R	A	V	A	V	Q	L	T
	D	W	R	G	G	S	E	F	R	W	N	H	Y	E	Q	C	P	V	K	L	L	L	T	L	K	R	T	H	G	F	L	M	I	L	P	Q	T	I	T	L	T	R	A	V	A	V	Q	L	T
G	A	Q	R	G	G	A	E	F	R	W	Q	H	Y	E	Q	C	P	I	K	L	L	L	T	L	K	R	T	H	W	F	L	M	I	L	L	Q	T	S	T	L	T	T	A	V	A	V	R	L	T
	D	Q	R	G	G	A	E	F	R	W	Q	H	Y	E	Q	C	P	I	K	L	L	L	T	F	K	R	T	H	W	F	L	M	I	L	L	Q	T	S	T	L	T	T	A	V	A	V	R	L	T
H	A	Q	R	G	G	A	E	F	R	W	Q	H	Y	E	Q	C	P	I	K	L	L	L	T	L	K	R	T	H	W	F	L	M	I	L	L	Q	T	S	T	L	T	T	A	V	A	V	R	L	T
	D	Q	R	G	G	A	E	F	R	W	Q	H	Y	E	Q	C	P	I	K	L	L	L	T	L	K	R	T	H	W	F	L	M	I	L	L	Q	T	S	T	L	T	T	A	V	A	V	R	L	T
I	A	Q	R	G	G	A	E	I	R	W	Q	H	Y	E	Q	C	P	I	K	L	L	L	T	L	K	R	T	H	W	F	L	M	I	L	L	Q	T	S	T	L	T	T	A	V	A	V	R	L	T
	D	Q	C	G	G	A	E	I	R	W	Q	H	Y	E	Q	C	P	I	K	L	L	L	T	L	K	R	T	H	W	L	L	M	I	L	L	Q	T	S	S	L	T	T	A	V	A	V	R	L	T
J	A	Q	R	G	G	A	E	I	R	W	Q	H	Y	E	Q	C	P	I	K	L	L	L	T	L	K	R	T	H	W	F	L	M	I	L	L	Q	T	S	T	L	T	T	A	V	A	V	Q	L	T
	D	R	R	R	G	G	E	I	R	W	Q	H	Y	E	R	C	P	L	K	L	L	F	T	L	K	S	I	I	G	F	V	M	I	L	L	Q	T	S	T	F	T	T	A	V	A	V	Q	L	T
K	A	Q	R	G	G	A	E	I	R	W	Q	H	Y	E	Q	C	P	I	K	L	L	L	T	L	K	R	T	H	W	F	L	M	I	L	L	Q	T	S	T	L	T	T	A	V	A	V	Q	L	T
	D	Q	R	G	G	A	E	F	R	W	Q	H	Y	E	Q	C	L	I	N	L	L	L	T	L	K	R	T	H	W	F	L	M	I	L	P	Q	T	S	T	L	I	T	A	V	A	V	Q	L	T
L	A	Q	R	G	G	A	E	I	R	W	Q	H	Y	E	Q	C	P	I	K	L	L	L	T	L	K	R	T	H	W	F	L	M	I	L	L	Q	T	S	T	L	T	T	A	V	A	V	R	L	T
	D	Q	R	G	G	A	E	I	R	W	Q	H	F	E	Q	C	P	I	K	L	L	L	T	L	K	R	T	H	W	F	L	M	I	L	L	Q	K	S	T	L	T	T	A	V	A	V	R	L	T
M	A	Q	R	G	G	A	E	I	R	W	Q	H	Y	E	Q	C	P	I	K	L	L	L	T	L	K	R	T	H	W	F	L	M	I	L	L	Q	T	S	T	L	T	T	A	V	A	V	R	L	T
	D	G	R	G	G	A	E	L	R	W	Q	H	Y	E	Q	C	P	I	K	L	L	L	T	L	K	R	T	H	W	L	L	M	F	F	L	Q	T	S	T	L	T	T	A	I	A	V	R	L	T
N	A	Q	R	G	G	S	E	F	R	W	H	H	Y	E	Q	C	P	I	K	L	L	L	T	L	K	R	T	H	G	F	L	M	I	L	L	Q	T	S	T	L	T	T	A	I	A	V	R	L	T
	D	K	C	G	G	S	E	Y	R	W	H	H	Y	E	L	C	S	I	K	L	I	L	S	L	K	R	T	H	G	F	L	T	I	L	L	Q	T	S	T	L	T	T	A	V	A	V	Q	L	A
O	A	Q	R	G	G	S	E	F	R	W	H	H	Y	E	Q	C	P	I	K	L	L	L	T	L	T	R	T	H	W	F	L	M	I	L	L	Q	T	S	T	L	T	T	A	I	A	V	R	L	T
	D	Q	R	G	G	S	E	F	R	W	H	H	Y	E	Q	C	P	I	K	L	L	L	A	L	T	R	T	H	W	F	L	M	I	L	L	Q	T	S	T	L	T	T	T	I	A	V	Q	V	T
P	A	Q	R	G	G	S	E	F	R	W	H	H	Y	E	Q	C	P	I	K	L	L	L	T	L	T	R	T	H	W	F	L	M	I	L	L	Q	T	S	T	L	T	T	A	I	A	V	R	L	T
	D	R	R	G	G	S	E	F	Q	W	Q	H	F	E	Q	C	P	I	K	L	L	L	T	F	S	R	I	H	L	F	L	M	V	L	L	Q	T	N	T	L	N	I	A	I	A	V	R	L	T
Q	A	Q	R	G	G	S	E	F	R	W	H	H	Y	E	E	C	P	I	K	L	L	L	T	L	K	R	T	H	G	F	L	M	I	L	L	Q	T	S	T	L	T	T	A	I	A	V	R	L	T
	D	Q	R	G	G	S	E	F	R	W	H	H	Y	E	E	C	P	I	K	L	L	L	T	L	K	R	T	H	G	F	L	M	I	L	L	Q	T	S	T	L	T	T	A	I	A	V	R	L	T
R	A	Q	R	G	G	S	E	F	R	W	H	H	H	E	E	C	P	I	K	L	L	L	T	L	K	R	T	H	G	F	L	M	I	L	L	Q	T	S	T	L	T	T	A	I	A	V	R	L	T
	D	Q	R	G	G	C	K	F	R	W	H	R	H	E	E	Y	P	I	K	I	F	L	T	L	K	R	T	I	G	I	L	M	I	L	L	R	T	S	T	L	I	I	A	I	A	V	Q	L	I
S	A	Q	R	G	G	S	E	F	R	W	H	H	H	E	E	C	P	I	K	L	L	L	T	L	K	R	T	H	G	F	L	M	I	L	L	Q	T	S	T	L	T	T	A	I	A	V	R	L	T
	D	Q	R	G	S	S	Q	F	R	R	H	H	H	E	E	C	P	I	R	L	L	L	T	F	K	R	T	H	G	F	L	M	I	L	P	Q	K	S	T	L	T	T	T	I	A	V	Q	L	T
T	A	Q	R	G	G	S	E	F	R	W	H	H	H	E	E	C	P	I	K	L	L	L	T	L	K	R	T	H	G	F	L	M	I	L	L	Q	T	S	T	L	T	T	A	I	A	V	R	L	T
	D	Q	R	G	G	S	E	F	R	W	H	H	H	E	E	C	P	I	K	L	L	L	T	L	K	R	T	H	G	F	L	M	I	L	L	Q	T	S	T	F	T	T	A	I	A	I	R	L	T
U	A	Q	R	G	G	S	E	F	R	W	H	H	Y	E	E	C	P	I	K	L	L	L	T	L	K	R	T	H	G	F	L	M	I	L	L	Q	T	S	T	L	T	R	A	I	A	V	R	L	T
	D	Q	R	G	G	S	E	F	R	W	H	C	F	E	E	C	P	I	K	L	L	L	T	L	K	G	T	H	G	F	L	I	I	F	L	L	I	S	P	L	I	R	I	I	A	V	R	L	T
V	A	Q	R	G	G	S	E	F	R	W	H	H	Y	E	E	C	P	I	K	L	L	L	T	L	K	R	T	H	G	F	L	M	I	L	L	Q	T	S	T	L	T	R	A	I	A	V	R	L	T
	D	Q	R	G	G	S	E	F	R	W	H	H	Y	E	E	C	P	I	K	L	L	F	T	L	K	R	T	H	G	L	L	M	I	L	L	Q	T	S	T	L	T	R	A	I	A	A	R	V	T
[truncated: 312 more columns]
