# Supplementary material for: Beyond RuBisCO: convergent molecular evolution of multiple chloroplast genes in C4 plants
Source: PeerJ. 2022 Jan 27;10:e12791. doi: 10.7717/peerj.12791 (PMC8801178; doi:10.7717/peerj.12791)
Supplement: Supplemental Information 4 — Only chloroplast genes with convergent and/or non-convergent replacements are shown. Convergent and non-convergentreplacements unique to a given category are highlighted in green and pink, respectively. Twelve otherwise conserved sites with more than 2 convergent replacements in C4:C4 comparisons are underlined. [file peerj-10-12791-s004.xlsx]

## Sheet: S7
Gene	Site	C4:C4		C3:C4		C3:C3
		Con	NC	Con	NC	Con	NC
matK	11	2	3	3	6	0	3
matK	14	0	0	2	0	0	0
matK	36	2	0	0	0	0	0
matK	39	0	2	0	0	0	0
matK	40	0	0	0	2	0	0
matK	41	0	0	0	2	0	0
matK	46	0	0	0	3	0	2
matK	64	2	0	0	0	0	0
matK	71	0	3	0	0	0	0
matK	77	2	2	0	0	0	0
matK	86	0	0	0	0	0	2
matK	89	0	2	3	3	2	0
matK	93	0	2	0	0	0	0
matK	115	2	0	0	3	0	0
matK	118	0	0	2	0	0	0
matK	119	0	0	0	3	2	0
matK	136	0	2	0	0	0	0
matK	143	0	2	0	0	0	0
matK	150	0	0	0	0	0	2
matK	167	0	0	0	0	0	2
matK	185	2	0	0	0	0	0
matK	196	0	0	0	0	0	2
matK	204	4	0	0	0	0	0
matK	205	2	0	0	0	0	0
matK	231	0	0	0	2	0	0
matK	240	2	0	0	0	0	0
matK	250	4	4	6	6	0	2
matK	259	0	2	0	0	0	0
matK	272	2	0	3	3	0	2
matK	277	0	2	0	0	0	0
matK	278	0	0	0	0	0	2
matK	288	0	0	0	2	0	0
matK	289	0	0	3	0	2	0
matK	295	2	3	0	0	0	0
matK	326	0	0	2	2	0	2
matK	328	0	0	2	2	0	2
matK	340	0	2	0	0	0	0
matK	345	0	0	0	2	0	0
matK	346	2	0	0	0	0	0
matK	361	0	2	3	3	2	0
matK	369	2	0	3	0	0	0
matK	372	0	0	2	3	0	3
matK	376	0	0	0	0	0	2
matK	382	0	0	0	2	0	0
matK	396	0	2	0	0	0	0
matK	427	0	0	4	0	3	0
matK	432	0	0	2	0	0	0
matK	480	0	0	0	0	0	2
matK	484	0	2	0	3	0	0
matK	491	0	0	3	0	2	0
matK	504	0	0	0	2	0	0
rps16	65	2	0	0	0	0	0
rps16	76	0	2	2	2	0	0
rps16	82	0	0	0	0	0	2
psbK	15	0	0	0	0	0	3
psbK	39	0	0	0	3	2	0
rpoB	8	2	3	0	4	0	0
rpoB	29	0	2	0	0	0	0
rpoB	229	0	2	0	0	0	0
rpoB	577	0	0	0	3	0	2
rpoB	608	2	3	3	2	0	0
rpoB	610	0	2	0	0	0	0
rpoB	613	0	0	0	2	0	0
rpoB	618	0	2	2	2	0	0
rpoB	663	0	0	2	0	0	0
rpoC1	21	0	0	0	2	0	0
rpoC1	169	2	3	0	0	0	0
rpoC1	259	0	0	0	2	0	0
rpoC1	436	2	0	0	0	0	0
rpoC1	562	0	0	0	2	0	0
rpoC1	568	0	0	0	0	2	3
rpoC1	583	4	0	0	6	0	2
rpoC1	595	2	0	0	0	0	0
rpoC1	599	0	0	2	0	0	0
rpoC1	600	0	0	0	2	0	0
rpoC2	19	2	0	0	0	0	0
rpoC2	91	0	0	0	0	2	0
rpoC2	120	0	0	2	0	0	0
rpoC2	224	2	0	4	0	2	0
rpoC2	240	0	0	0	2	0	0
rpoC2	287	0	2	0	0	0	0
rpoC2	397	0	0	0	3	0	2
rpoC2	432	0	0	2	0	0	0
rpoC2	450	0	2	0	0	0	0
rpoC2	472	0	2	0	0	0	0
rpoC2	485	0	0	0	2	0	0
rpoC2	526	0	0	2	0	0	0
rpoC2	538	2	0	0	0	0	0
rpoC2	541	0	3	0	0	0	0
rpoC2	546	2	0	0	0	0	0
rpoC2	558	0	0	0	2	0	0
rpoC2	577	0	2	2	2	0	0
rpoC2	595	0	0	2	0	0	0
rpoC2	596	0	2	2	2	0	0
rpoC2	627	2	0	3	0	0	0
rpoC2	628	2	0	0	0	0	0
rpoC2	789	2	0	0	0	0	0
rpoC2	800	0	0	2	0	0	0
rpoC2	813	0	2	2	2	0	0
rpoC2	875	0	0	0	0	3	0
rpoC2	880	0	0	2	0	0	0
rpoC2	891	0	2	0	0	0	0
rpoC2	893	0	0	0	2	0	0
rpoC2	900	0	2	0	0	0	0
rpoC2	904	0	0	0	2	0	0
rpoC2	925	0	0	3	0	2	0
rpoC2	929	0	2	0	0	0	0
rpoC2	931	2	3	0	4	0	0
rpoC2	938	0	2	0	0	0	0
rpoC2	946	3	0	4	0	0	0
rpoC2	960	0	0	0	0	0	2
rpoC2	1013	0	0	2	0	0	0
rpoC2	1040	0	2	0	0	0	0
rpoC2	1041	0	0	2	0	0	0
rpoC2	1046	0	0	2	0	0	0
rpoC2	1056	3	0	0	5	0	2
rpoC2	1101	2	0	0	0	0	0
rpoC2	1106	2	0	0	0	0	0
rpoC2	1115	0	3	0	0	0	0
rpoC2	1122	4	4	3	3	0	0
rpoC2	1151	0	3	0	0	0	0
rpoC2	1158	0	0	2	0	0	0
rpoC2	1178	0	0	0	2	0	0
rpoC2	1191	0	0	2	2	0	2
rpoC2	1200	0	3	0	0	0	0
rpoC2	1202	0	0	0	0	2	0
rpoC2	1203	0	2	0	0	0	0
rpoC2	1215	2	3	0	0	0	0
rpoC2	1221	0	2	0	0	0	0
rpoC2	1296	0	0	2	0	0	0
rpoC2	1300	0	0	2	0	0	0
rpoC2	1312	0	2	0	0	0	0
rpoC2	1431	0	2	2	2	0	0
rpoC2	1469	0	0	0	0	2	0
rpoC2	1478	0	2	0	3	0	0
rpoC2	1483	0	2	0	3	0	0
rpoC2	1487	0	0	2	2	0	2
rpoC2	1489	0	0	2	0	0	0
rpoC2	1494	0	0	0	2	0	0
rps2	9	0	0	0	2	0	0
rps2	160	0	0	0	0	0	2
atpF	149	0	0	2	0	0	0
atpA	214	0	0	3	0	2	0
atpA	460	0	0	3	0	2	0
rps14	25	2	0	0	0	0	0
rps14	27	0	2	0	0	0	0
psaA	13	0	0	0	0	0	2
psaA	490	0	2	0	0	0	0
rps4	170	2	0	0	0	0	0
ndhJ	27	2	0	0	0	0	0
ndhJ	35	0	0	2	2	0	2
ndhK	162	0	2	0	0	0	0
ndhK	220	0	2	0	0	0	0
ndhC	88	0	0	2	0	0	0
atpB	10	0	0	0	2	0	0
atpB	20	0	0	2	2	0	2
atpB	105	2	0	0	0	0	0
atpB	314	0	0	2	0	0	0
atpB	468	3	0	4	0	0	0
rbcL	10	2	0	3	0	0	0
rbcL	93	2	0	3	0	0	0
rbcL	94	2	0	0	3	0	0
rbcL	95	0	2	0	3	0	0
rbcL	101	6	0	0	0	0	0
rbcL	143	3	0	0	0	0	0
rbcL	145	0	2	0	0	0	0
rbcL	228	0	0	0	0	2	0
rbcL	251	0	0	0	0	2	0
rbcL	262	0	0	0	2	0	0
rbcL	279	0	0	2	0	0	0
rbcL	281	3	0	0	4	0	0
rbcL	309	5	0	0	0	0	0
rbcL	328	4	0	0	0	0	0
rbcL	341	0	0	3	0	2	0
rbcL	418	0	0	2	0	0	0
rbcL	447	0	2	2	2	0	0
rbcL	461	2	0	0	0	0	0
psaI	4	2	0	0	0	0	0
psaI	24	2	0	0	3	0	0
ycf4	40	0	0	0	2	0	0
ycf4	64	0	0	2	0	0	0
ycf4	94	0	0	0	2	0	0
cemA	42	0	0	2	2	0	2
cemA	44	0	0	0	2	0	0
cemA	84	0	0	0	2	0	0
cemA	90	0	0	0	2	0	0
cemA	98	0	0	2	0	0	0
cemA	127	0	2	0	0	0	0
cemA	132	2	0	0	0	0	0
cemA	180	0	0	0	2	0	0
petA	29	0	0	0	2	0	0
petA	32	0	0	2	0	0	0
petA	63	0	0	2	0	0	0
petA	122	0	2	2	2	0	0
petA	153	0	0	2	0	0	0
psbJ	20	0	0	2	0	0	0
rpl33	44	2	0	0	0	0	0
rps18	124	0	0	0	2	0	0
rps18	138	0	0	0	2	0	0
rpl20	112	0	0	0	2	0	0
clpP	198	0	0	0	2	0	0
clpP	199	0	0	0	0	2	0
psbB	21	0	2	2	2	0	0
psbB	73	0	0	2	0	0	0
psbB	85	0	0	2	0	0	0
psbB	121	0	0	2	0	0	0
psbB	507	0	0	2	0	0	0
psbH	12	0	0	0	0	2	0
petD	138	0	0	0	2	0	0
rpoA	68	2	3	0	4	0	0
rpoA	119	0	2	0	0	0	0
rpoA	133	0	0	0	2	0	0
rpoA	141	0	2	2	2	0	0
rpoA	143	0	2	0	0	0	0
rpoA	162	0	0	0	2	0	0
rpoA	192	0	2	0	0	0	0
rpoA	225	2	0	0	0	0	0
rpoA	235	2	0	0	0	0	0
rpoA	236	2	3	0	0	0	0
rpoA	290	0	0	2	0	0	0
rpoA	308	0	0	0	2	0	0
rpoA	310	0	0	0	2	0	0
rpoA	311	0	0	0	2	0	0
rpoA	313	2	0	0	0	0	0
rpoA	317	0	2	0	0	0	0
rpoA	319	2	0	0	0	0	0
rpoA	330	2	0	3	0	0	0
rps11	14	0	0	0	2	0	0
rps11	20	2	0	0	0	0	0
infA	42	0	0	0	0	0	2
rps8	55	2	0	0	0	0	0
rps8	65	0	0	2	0	0	0
rps8	93	0	0	0	2	0	0
rps8	114	0	0	0	0	0	2
rpl16	22	0	2	0	0	0	0
rpl16	26	0	2	0	0	0	0
rpl16	132	0	0	0	2	0	0
rps3	54	0	0	0	2	0	0
rps3	63	0	0	3	0	2	0
rps3	97	0	0	2	0	0	0
rps3	114	0	0	2	0	0	0
rps3	161	2	3	0	0	0	0
rps3	166	2	0	0	0	0	0
rpl22	41	0	0	2	0	0	0
rpl22	45	0	0	0	2	0	0
rpl22	67	0	0	0	0	2	0
rpl22	113	0	0	0	0	2	0
rpl22	129	0	0	0	0	0	2
ndhF	54	0	0	2	0	0	0
ndhF	56	0	0	0	2	0	0
ndhF	57	0	0	2	0	0	0
ndhF	229	0	0	2	0	0	0
ndhF	281	0	0	2	0	0	0
ndhF	289	3	0	4	0	0	0
ndhF	292	0	0	2	0	0	0
ndhF	293	2	0	0	0	0	0
ndhF	363	3	0	5	0	2	0
ndhF	400	0	2	0	0	0	0
ndhF	431	2	0	0	0	0	0
ndhF	484	0	0	0	2	0	0
ndhF	487	0	0	2	0	0	0
ndhF	490	0	2	0	0	0	0
ndhF	496	0	0	0	3	2	0
ndhF	498	2	3	0	0	0	0
ndhF	505	2	0	0	0	0	0
ndhF	511	0	0	0	2	0	0
ndhF	512	0	0	0	2	0	0
ndhF	520	2	0	3	0	0	0
ndhF	523	2	0	0	0	0	0
ndhF	527	0	2	0	3	0	0
ndhF	529	0	0	2	2	0	2
ndhF	535	0	2	0	0	0	0
ndhF	550	0	0	0	3	0	2
ndhF	555	0	0	2	0	0	0
ndhF	557	0	0	0	0	3	0
ndhF	572	0	0	2	0	0	0
ndhF	576	0	0	0	0	2	0
ndhF	587	0	2	0	3	0	0
ndhF	589	0	0	0	2	0	0
ndhF	602	2	3	0	0	0	0
ndhF	607	2	0	0	0	0	0
ndhF	634	0	0	2	0	0	0
ndhF	636	0	2	4	6	2	4
ndhF	644	0	0	0	3	0	2
ndhF	646	2	0	0	0	0	0
ndhF	647	2	0	0	4	0	2
ndhF	673	0	0	0	4	3	0
ndhF	680	0	2	0	0	0	0
ndhF	685	0	0	3	0	2	0
ndhF	686	2	4	2	4	0	0
ndhF	688	0	2	0	0	0	0
ndhF	697	3	0	0	0	0	0
ndhF	704	2	0	0	0	0	0
ndhF	711	0	2	0	0	0	0
ndhF	735	0	2	2	2	0	0
rpl32	25	0	0	2	0	0	0
rpl32	43	0	0	0	2	0	0
rpl32	46	0	0	0	3	0	2
ccsA	23	3	0	4	0	0	0
ccsA	28	0	0	2	0	0	0
ccsA	61	0	0	0	2	0	0
ccsA	100	0	2	0	0	0	0
ccsA	111	0	0	2	0	0	0
ccsA	116	0	0	2	0	0	0
ccsA	166	2	0	0	0	0	0
ccsA	188	0	0	0	2	0	0
ccsA	225	2	0	3	0	0	0
ccsA	235	0	2	0	0	0	0
ccsA	278	2	0	3	0	0	0
ccsA	287	2	0	0	0	0	0
ndhD	13	0	0	2	0	0	0
ndhD	47	0	0	2	0	0	0
ndhD	65	0	0	2	0	0	0
ndhD	68	0	0	2	0	0	0
ndhD	112	0	0	0	2	0	0
ndhD	194	0	2	0	0	0	0
ndhD	199	2	0	0	0	0	0
ndhD	207	0	0	0	2	0	0
ndhD	293	2	0	0	0	0	0
ndhD	332	0	2	0	0	0	0
ndhD	356	2	0	0	0	0	0
ndhD	448	0	0	0	2	0	0
ndhD	450	2	0	0	0	0	0
ndhD	452	2	0	0	0	0	0
ndhD	455	0	0	0	2	0	0
ndhD	467	0	0	2	0	0	0
ndhD	481	0	0	2	0	0	0
ndhD	492	0	2	2	2	0	0
ndhE	85	0	2	0	0	0	0
ndhE	97	0	2	0	0	0	0
ndhG	83	0	0	0	2	0	0
ndhG	103	3	4	0	0	0	0
ndhG	106	0	2	0	0	0	0
ndhI	25	6	0	0	0	0	0
ndhI	162	3	0	0	0	0	0
ndhI	172	0	2	0	0	0	0
ndhA	23	2	0	4	3	2	3
ndhA	27	2	0	0	0	0	0
ndhA	34	0	0	0	2	0	0
ndhA	42	0	0	2	0	0	0
ndhA	45	2	0	0	0	0	0
ndhA	83	0	0	0	2	0	0
ndhA	93	2	3	3	2	0	0
ndhA	117	2	0	0	0	0	0
ndhA	267	2	0	0	0	0	0
ndhA	280	2	0	0	0	0	0
ndhA	289	0	0	0	2	0	0
ndhA	302	0	2	3	3	2	0
ndhA	304	0	2	0	0	0	0
ndhH	18	7	0	8	0	0	0
ndhH	30	0	0	2	0	0	0
ndhH	43	0	0	2	0	0	0
ndhH	59	2	0	0	0	0	0
ndhH	96	0	2	2	2	0	0
ndhH	172	0	2	0	0	0	0
ndhH	195	2	0	0	0	0	0
ndhH	238	0	0	0	2	0	0
ndhH	266	2	0	0	0	0	0
ndhH	269	2	0	3	0	0	0
ndhH	279	0	0	3	0	2	0
