# Supplementary material for: Beyond RuBisCO: convergent molecular evolution of multiple chloroplast genes in C4 plants
Source: PeerJ. 2022 Jan 27;10:e12791. doi: 10.7717/peerj.12791 (PMC8801178; doi:10.7717/peerj.12791)
Supplement: Supplemental Information 5 — An asterisk is next genes with significant differences in replacements between C4:C4 and C3:C4 pairs (P < 0.05, Boschloo’s test). Genes with convergent replacements only in C4:C4 pairs are underlined. [file peerj-10-12791-s005.xlsx]

## Sheet: S8
		Amino acid replacements in corresponding protein						Sites with amino acid replacements in corresponding protein
Gene	aa	C4:C4		C3:C4		C3:C3		C4:C4		C3:C4		C3:C3
		Con	NC	Con	NC	Con	NC	Con	NC	Con	NC	Con	NC
atpA	505	0	0	6	0	4	0	0	0	2	0	2	0
atpB	497	5	0	8	4	0	2	2	0	3	2	0	1
atpF	183	0	0	2	0	0	0	0	0	1	0	0	0
ccsA	293	11	4	16	4	0	0	5	2	6	2	0	0
cemA	230	2	2	4	10	0	2	1	1	2	5	0	1
clpP	216	0	0	0	2	2	0	0	0	0	1	1	0
infA	87	0	0	0	0	0	2	0	0	0	0	0	1
matK	499	32	37	43	54	13	30	14	16	15	19	6	14
ndhA	297	14	7	12	14	4	3	7	3	4	6	2	1
ndhC	120	0	0	2	0	0	0	0	0	1	0	0	0
ndhD	500	10	6	14	10	0	0	5	3	7	5	0	0
ndhE	100	0	4	0	0	0	0	0	2	0	0	0	0
ndhF	710	33	30	43	47	17	12	15	13	17	16	7	5
ndhG	176	3	6	0	2	0	0	1	2	0	1	0	0
ndhH	383	15	4	20	4	2	0	5	2	6	2	1	0
ndhI	175	9	2	0	0	0	0	2	1	0	0	0	0
ndhJ	159	2	0	2	2	0	2	1	0	1	1	0	1
ndhK	225	0	4	0	0	0	0	0	2	0	0	0	0
petA	320	0	2	8	4	0	0	0	1	4	2	0	0
petD	157	0	0	0	2	0	0	0	0	0	1	0	0
psaA	750	0	2	0	0	0	2	0	1	0	0	0	1
psaI	36	4	0	0	3	0	0	2	0	0	1	0	0
psbB	508	0	2	10	2	0	0	0	1	5	1	0	0
psbH	73	0	0	0	0	2	0	0	0	0	0	1	0
psbJ	40	0	0	2	0	0	0	0	0	1	0	0	0
psbK	61	0	0	0	3	2	3	0	0	0	1	1	1
rbcL*	467	29	6	15	14	6	0	9	3	6	5	3	0
rpl16	118	0	4	0	2	0	0	0	2	0	1	0	0
rpl20	116	0	0	0	2	0	0	0	0	0	1	0	0
rpl22	141	0	0	2	2	4	2	0	0	1	1	2	1
rpl32	53	0	0	2	5	0	2	0	0	1	2	0	1
rpl33	66	2	0	0	0	0	0	1	0	0	0	0	0
rpoA	335	14	16	7	16	0	0	7	7	3	7	0	0
rpoB	1073	4	14	7	13	0	2	2	6	3	5	0	1
rpoC1*	671	10	3	2	14	2	5	4	1	1	5	1	2
rpoC2*	1347	32	56	55	47	13	10	14	24	24	19	6	5
rps11	143	2	0	0	2	0	0	1	0	0	1	0	0
rps14	101	2	2	0	0	0	0	1	1	0	0	0	0
rps16	57	2	2	2	2	0	2	1	1	1	1	0	1
rps18	113	0	0	0	4	0	0	0	0	0	2	0	0
rps2	232	0	0	0	2	0	2	0	0	0	1	0	1
rps3	221	4	3	7	2	2	0	2	1	3	1	1	0
rps4	201	2	0	0	0	0	0	1	0	0	0	0	0
rps8	136	2	0	2	2	0	2	1	0	1	1	0	1
ycf4	185	0	0	2	4	0	0	0	0	1	2	0	0
