# Supplementary material for: Beyond RuBisCO: convergent molecular evolution of multiple chloroplast genes in C4 plants
Source: PeerJ. 2022 Jan 27;10:e12791. doi: 10.7717/peerj.12791 (PMC8801178; doi:10.7717/peerj.12791)
Supplement: Supplemental Information 6 — Proportions of pairs of reference branches over all branches by category are shown in parenthesis. One asterisk: significant differences between C4:C4 pairs and both C3:C3 and C3:C4 pairs (P < 0.05, Boschloo’s test). Two asterisks: significant differences between C4:C4 pairs and C3:C4 pairs only (P < 0.05, Boschloo’s test). Con: convergent. NC: non-convergent. Con > NC: pairs of branches with more convergent than non-convergent replacements. Con > 1: pairs of branches with more than one convergent replacement. [file peerj-10-12791-s006.xlsx]

## Sheet: Sheet1
	C3:C3	C3:C4	C4:C4
No replacements*	12 (.33)	35 (.30)	7 (.09)
No Con*	17 (.47)	52 (.44)	14 (.18)
w/Con*	19 (.53)	65 (.56)	64 (.82)
w/NC**	18 (.50)	63 (.54)	53 (.68)
Con>NC**	10 (.28)	36 (.31)	40 (.51)
Con>1*	7 (.19)	39 (.33)	43 (.56)
One asterisk: significant differences between C4:C4 pairs and both C3:C3 and C3:C4 pairs (P < 0.05, Boschloo’s test).
Two asterisks: significant differences between C4:C4 pairs and C3:C4 pairs only (P < 0.05, Boschloo’s test).
Con: convergent.
NC: non-convergent.
Con>NC: pairs of branches with more convergent than non-convergent replacements.
Con>1: pairs of branches with more than one convergent replacement.
