# Supplementary material for: Beyond RuBisCO: convergent molecular evolution of multiple chloroplast genes in C4 plants
Source: PeerJ. 2022 Jan 27;10:e12791. doi: 10.7717/peerj.12791 (PMC8801178; doi:10.7717/peerj.12791)
Supplement: Supplemental Information 7 — Reference branch positions within the phylogeny are shown in Fig. 1. [file peerj-10-12791-s007.xlsx]

## Sheet: S6
Branch Pair	Con	NC	Photosynthesis type
A-B	1	2	C4-C4
A-C	0	1	C4-C4
A-D	1	2	C3-C4
A-E	1	2	C4-C4
A-F	1	0	C4-C4
A-G	1	0	C4-C4
A-H	0	0	C3-C4
A-I	3	0	C4-C4
A-J	4	0	C4-C4
A-K	1	1	C4-C4
A-L	1	0	C3-C4
A-M	1	0	C3-C4
A-N	1	3	C3-C4
A-O	1	0	C3-C4
A-P	2	1	C4-C4
A-Q	0	1	C3-C4
A-R	3	6	C3-C4
A-S	4	2	C4-C4
A-T	1	0	C4-C4
A-U	1	4	C3-C4
A-V	6	3	C4-C4
B-C	0	0	C4-C4
B-D	0	1	C3-C4
B-E	1	1	C4-C4
B-F	2	0	C4-C4
B-G	2	0	C4-C4
B-H	0	0	C3-C4
B-I	4	0	C4-C4
B-J	2	2	C4-C4
B-K	1	1	C4-C4
B-L	0	1	C3-C4
B-M	0	0	C3-C4
B-N	7	1	C3-C4
B-O	3	0	C3-C4
B-P	5	1	C4-C4
B-Q	2	0	C3-C4
B-R	4	1	C3-C4
B-S	5	2	C4-C4
B-T	0	0	C4-C4
B-U	1	2	C3-C4
B-V	3	3	C4-C4
C-D	1	0	C3-C4
C-E	3	1	C4-C4
C-F	2	0	C4-C4
C-G	1	1	C4-C4
C-H	0	0	C3-C4
C-I	3	2	C4-C4
C-J	5	1	C4-C4
C-K	0	1	C4-C4
C-L	0	1	C3-C4
C-M	0	2	C3-C4
C-N	2	3	C3-C4
C-O	1	2	C3-C4
C-P	4	4	C4-C4
C-Q	1	0	C3-C4
C-R	6	6	C3-C4
C-S	4	3	C4-C4
C-T	0	0	C4-C4
C-U	2	4	C3-C4
C-V	2	2	C4-C4
D-E	2	1	C3-C4
D-F	1	2	C3-C4
D-G	0	0	C3-C4
D-H	0	0	C3-C3
D-I	0	2	C3-C4
D-J	1	2	C3-C4
D-K	0	2	C3-C4
D-L	0	0	C3-C3
D-M	1	2	C3-C3
D-N	1	2	C3-C3
D-O	0	2	C3-C3
D-P	1	0	C3-C4
D-Q	1	1	C3-C3
D-R	2	3	C3-C3
D-S	1	5	C3-C4
D-T	0	0	C3-C4
D-U	0	2	C3-C3
D-V	1	2	C3-C4
E-F	0	1	C4-C4
E-G	1	1	C4-C4
E-H	1	0	C3-C4
E-I	3	0	C4-C4
E-J	3	6	C4-C4
E-K	0	0	C4-C4
E-L	0	0	C3-C4
E-M	1	1	C3-C4
E-N	4	8	C3-C4
E-O	0	1	C3-C4
E-P	6	1	C4-C4
E-Q	0	0	C3-C4
E-R	3	4	C3-C4
E-S	3	4	C4-C4
E-T	2	0	C4-C4
E-U	2	3	C3-C4
E-V	4	4	C4-C4
F-G	1	1	C4-C4
F-H	0	0	C3-C4
F-I	1	0	C4-C4
F-J	1	4	C4-C4
F-K	0	0	C4-C4
F-L	0	0	C3-C4
F-M	3	1	C3-C4
F-N	3	1	C3-C4
F-O	0	0	C3-C4
F-P	2	4	C4-C4
F-Q	0	0	C3-C4
F-R	1	2	C3-C4
F-S	1	1	C4-C4
F-T	0	1	C4-C4
F-U	1	0	C3-C4
F-V	1	1	C4-C4
G-H	0	0	C3-C4
G-I	3	1	C4-C4
G-J	2	0	C4-C4
G-K	1	0	C4-C4
G-L	0	0	C3-C4
G-M	0	0	C3-C4
G-N	1	0	C3-C4
G-O	0	1	C3-C4
G-P	4	2	C4-C4
G-Q	0	0	C3-C4
G-R	1	1	C3-C4
G-S	4	0	C4-C4
G-T	2	0	C4-C4
G-U	0	0	C3-C4
G-V	3	1	C4-C4
H-I	1	0	C3-C4
H-J	0	0	C3-C4
H-K	0	0	C3-C4
H-L	0	0	C3-C3
H-M	0	0	C3-C3
H-N	0	0	C3-C3
H-O	0	1	C3-C3
H-P	0	1	C3-C4
H-Q	0	0	C3-C3
H-R	1	0	C3-C3
H-S	0	1	C3-C4
H-T	0	0	C3-C4
H-U	0	0	C3-C3
H-V	0	1	C3-C4
I-J	5	2	C4-C4
I-K	4	0	C4-C4
I-L	0	0	C3-C4
I-M	2	1	C3-C4
I-N	3	3	C3-C4
I-O	0	0	C3-C4
I-P	6	2	C4-C4
I-Q	1	0	C3-C4
I-R	3	2	C3-C4
I-S	5	5	C4-C4
I-T	3	0	C4-C4
I-U	5	3	C3-C4
I-V	7	2	C4-C4
J-K	0	1	C4-C4
J-L	0	1	C3-C4
J-M	1	2	C3-C4
J-N	2	6	C3-C4
J-O	0	2	C3-C4
J-P	6	6	C4-C4
J-Q	0	0	C3-C4
J-R	5	4	C3-C4
J-S	6	6	C4-C4
J-T	2	1	C4-C4
J-U	1	7	C3-C4
J-V	2	4	C4-C4
K-L	2	1	C3-C4
K-M	0	2	C3-C4
K-N	1	2	C3-C4
K-O	0	0	C3-C4
K-P	1	2	C4-C4
K-Q	0	0	C3-C4
K-R	4	0	C3-C4
K-S	2	3	C4-C4
K-T	0	0	C4-C4
K-U	2	2	C3-C4
K-V	2	1	C4-C4
L-M	0	0	C3-C3
L-N	1	0	C3-C3
L-O	0	0	C3-C3
L-P	3	0	C3-C4
L-Q	0	0	C3-C3
L-R	1	2	C3-C3
L-S	3	0	C3-C4
L-T	0	0	C3-C4
L-U	1	1	C3-C3
L-V	0	2	C3-C4
M-N	1	6	C3-C3
M-O	1	0	C3-C3
M-P	1	4	C3-C4
M-Q	1	0	C3-C3
M-R	3	5	C3-C3
M-S	0	3	C3-C4
M-T	0	0	C3-C4
M-U	2	1	C3-C3
M-V	4	2	C3-C4
N-O	2	2	C3-C3
N-P	4	7	C3-C4
N-Q	0	0	C3-C3
N-R	8	5	C3-C3
N-S	4	8	C3-C4
N-T	1	1	C3-C4
N-U	4	8	C3-C3
N-V	4	7	C3-C4
O-P	0	0	C3-C4
O-Q	1	0	C3-C3
O-R	3	1	C3-C3
O-S	3	1	C3-C4
O-T	2	0	C3-C4
O-U	0	1	C3-C3
O-V	3	0	C3-C4
P-Q	0	0	C3-C4
P-R	5	2	C3-C4
P-S	6	3	C4-C4
P-T	2	0	C4-C4
P-U	6	3	C3-C4
P-V	10	7	C4-C4
Q-R	0	0	C3-C3
Q-S	1	2	C3-C4
Q-T	2	1	C3-C4
Q-U	1	0	C3-C3
Q-V	1	0	C3-C4
R-S	16	7	C3-C4
R-T	5	0	C3-C4
R-U	8	4	C3-C3
R-V	5	6	C3-C4
S-T	0	2	C4-C4
S-U	5	7	C3-C4
S-V	5	10	C4-C4
T-U	0	0	C3-C4
T-V	4	3	C4-C4
U-V	0	3	C3-C4
